# Supplementary material for: Sequential Au(I)-catalyzed reaction of water with o-acetylenyl-substituted phenyldiazoacetates
Source: publisher site journal article supplement (doi:10.3762/bjoc.7.74), 2011-05-18

# Supporting Information

for

## Sequential Au(I)-catalyzed reaction of water with *o*-acetylenyl-substituted phenyldiazoacetates

Lei Zhou, Yizhou Liu, Yan Zhang and Jianbo Wang\*

Address: Beijing National Laboratory of Molecular Sciences (BNLMS), Key  
Laboratory of Bioorganic Chemistry and Molecular Engineering of Ministry of  
Education, College of Chemistry, Peking University, Beijing 100871, China

Email: Jianbo Wang - [wangjb@pku.edu.cn](mailto:wangjb@pku.edu.cn)

\*Corresponding author

### <sup>1</sup>H and <sup>13</sup>C NMR spectra

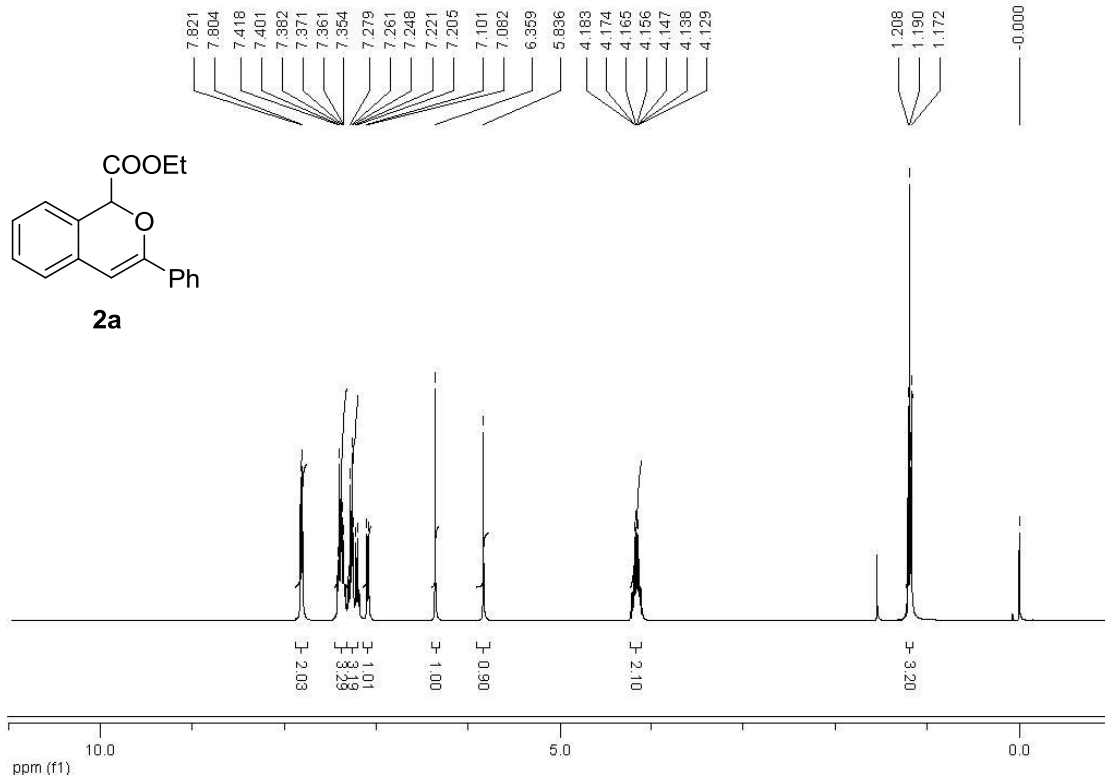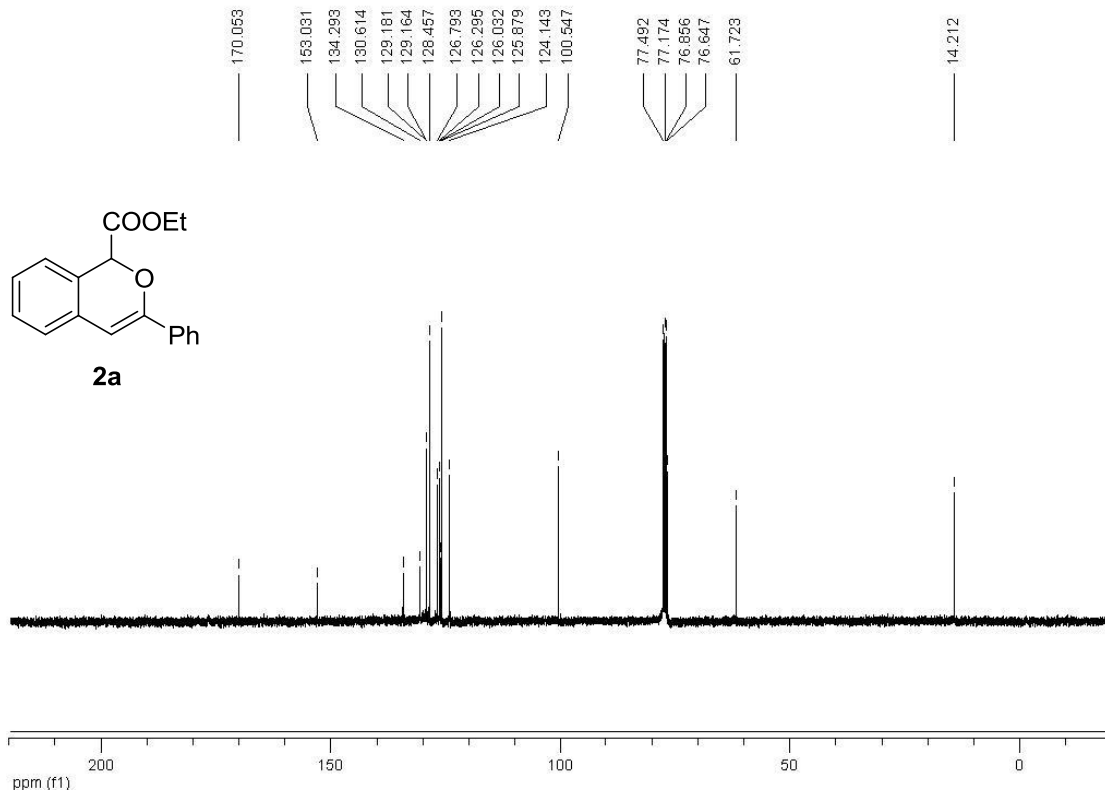

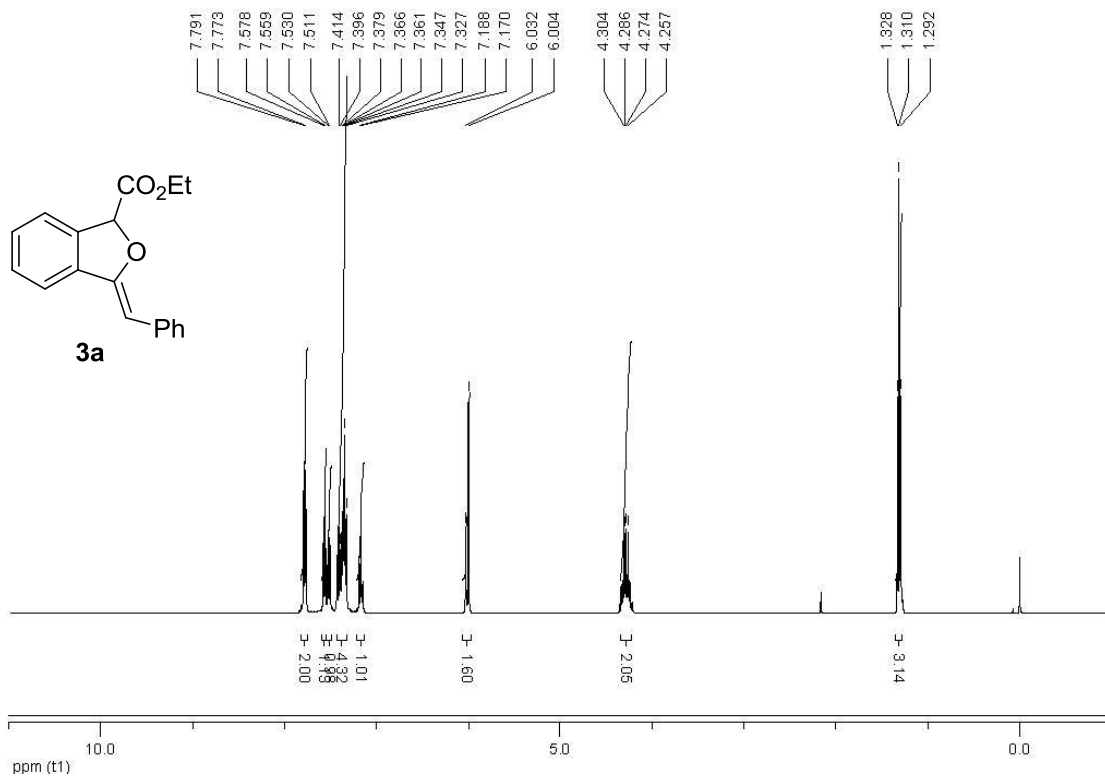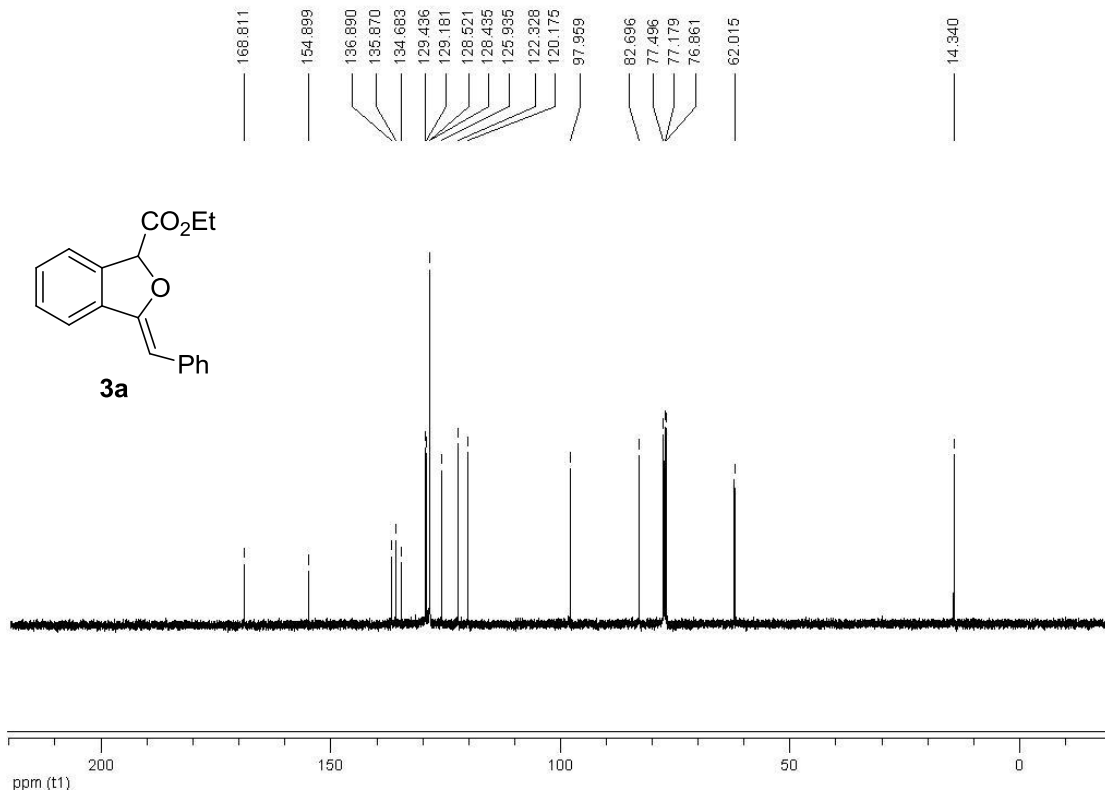

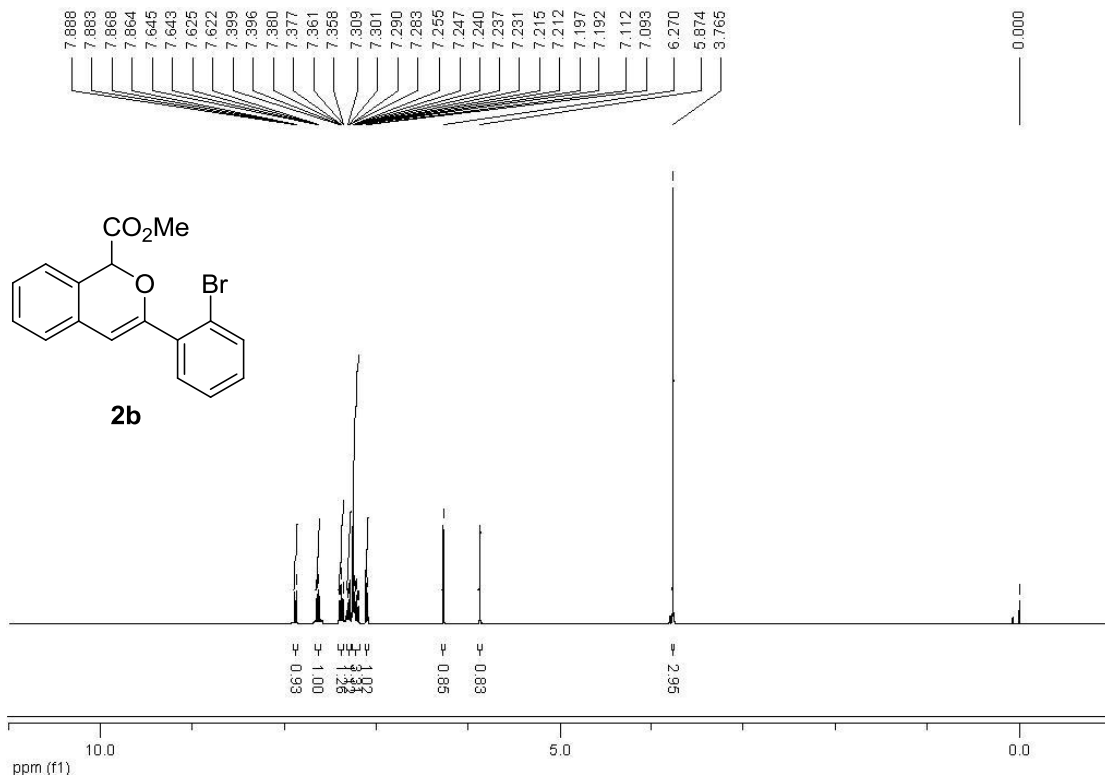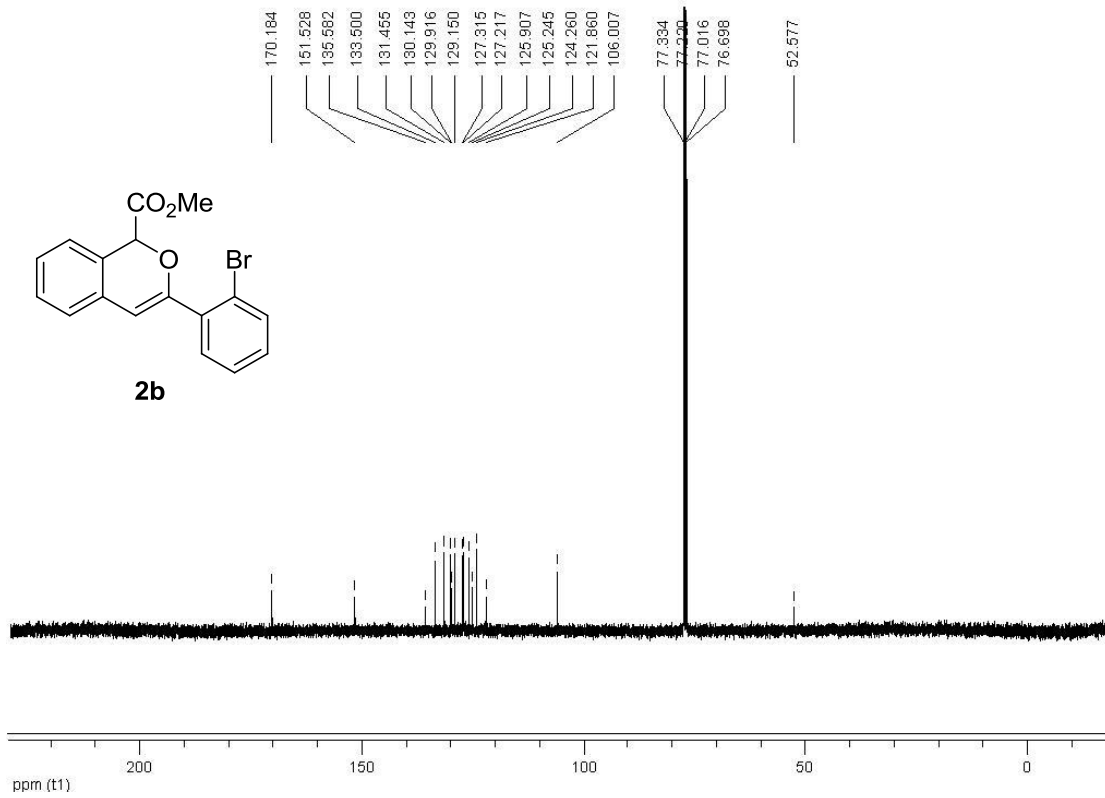



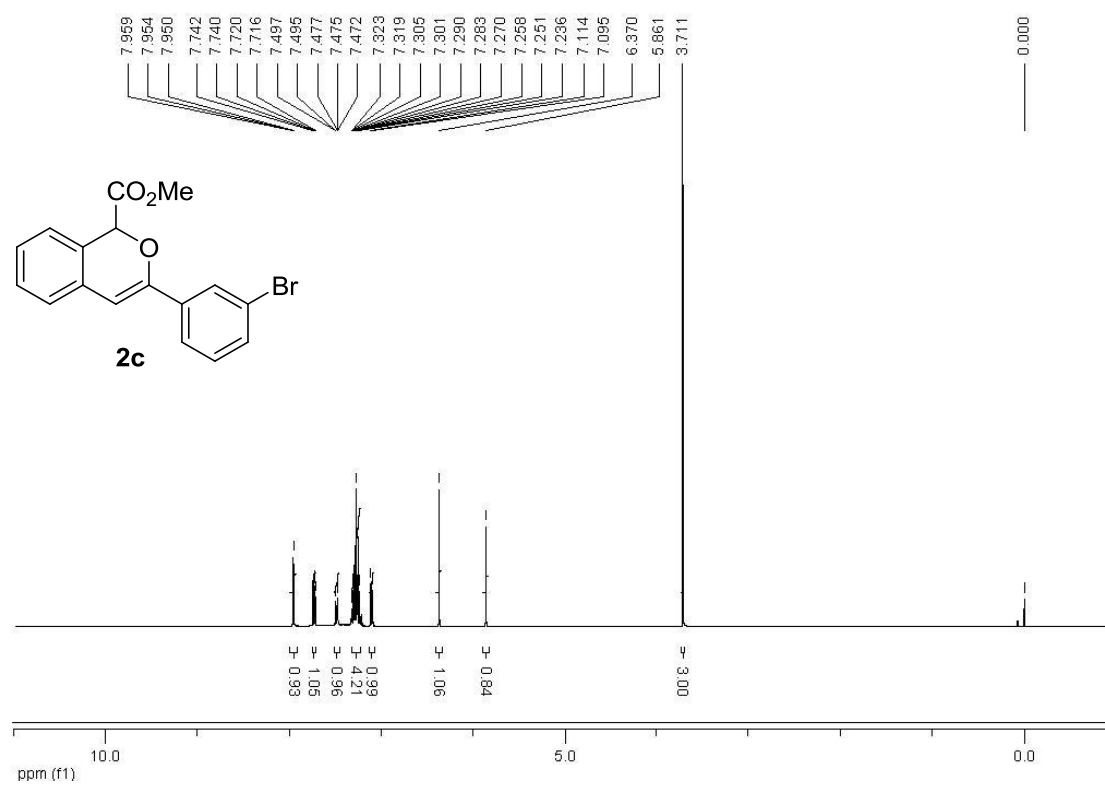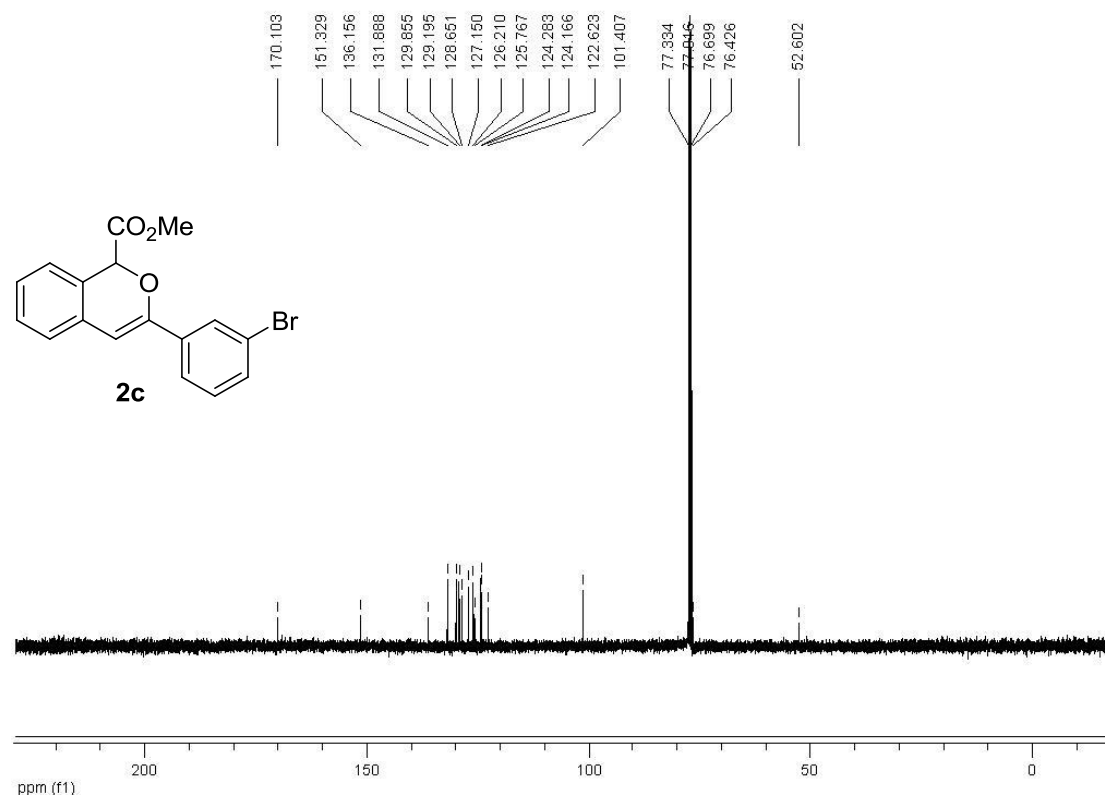

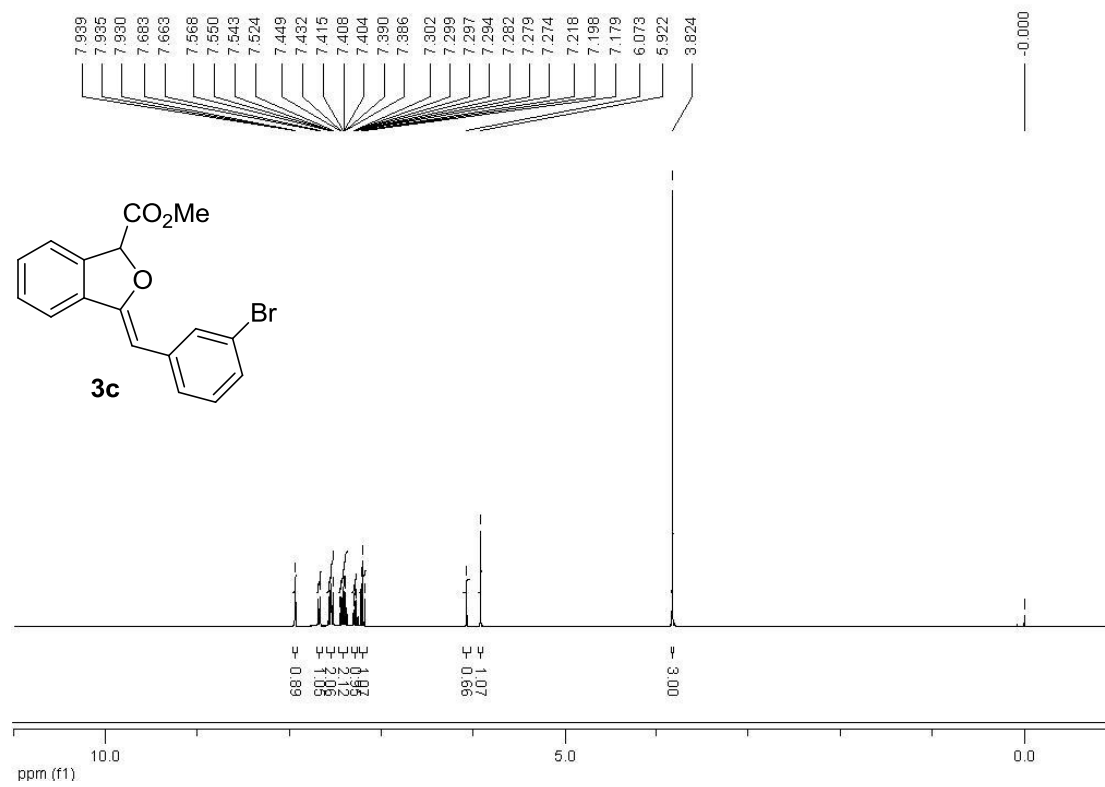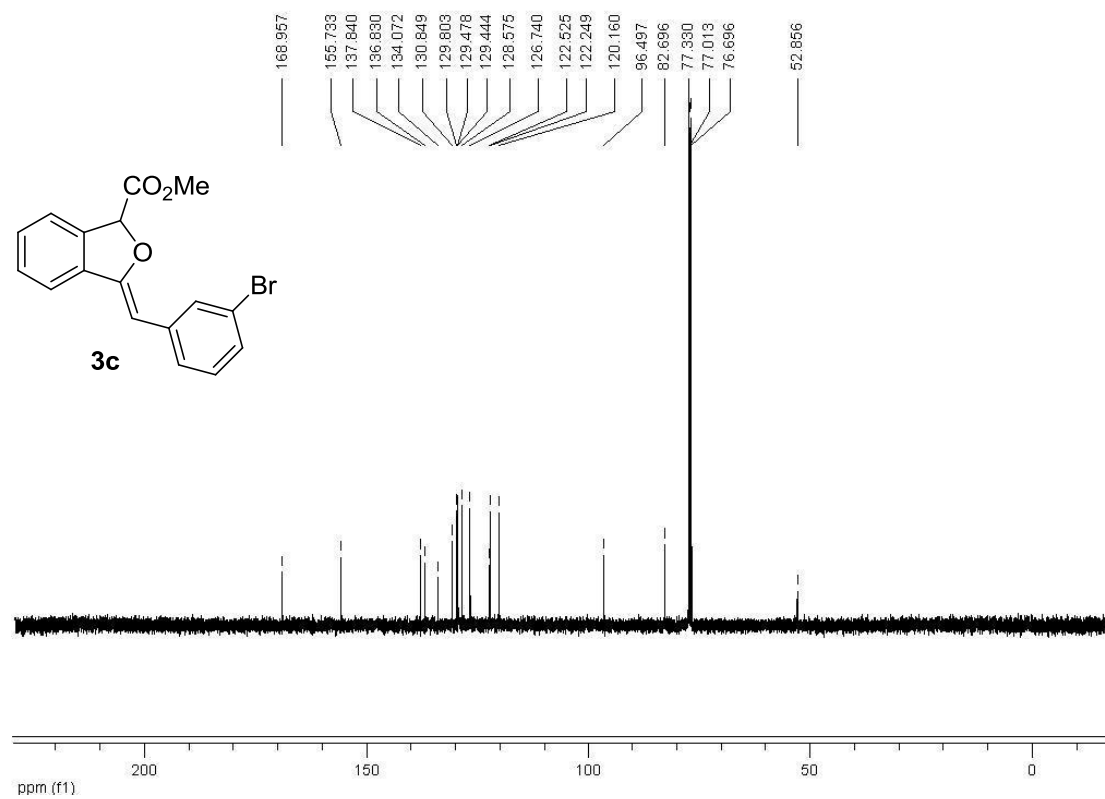

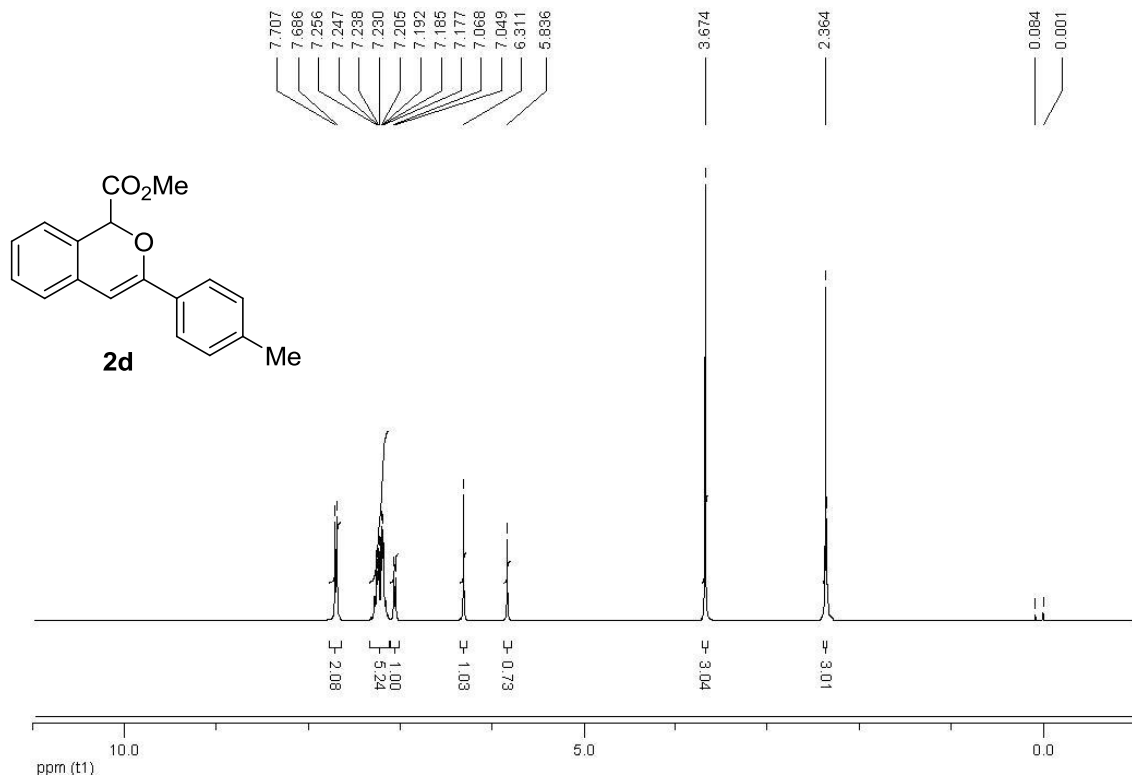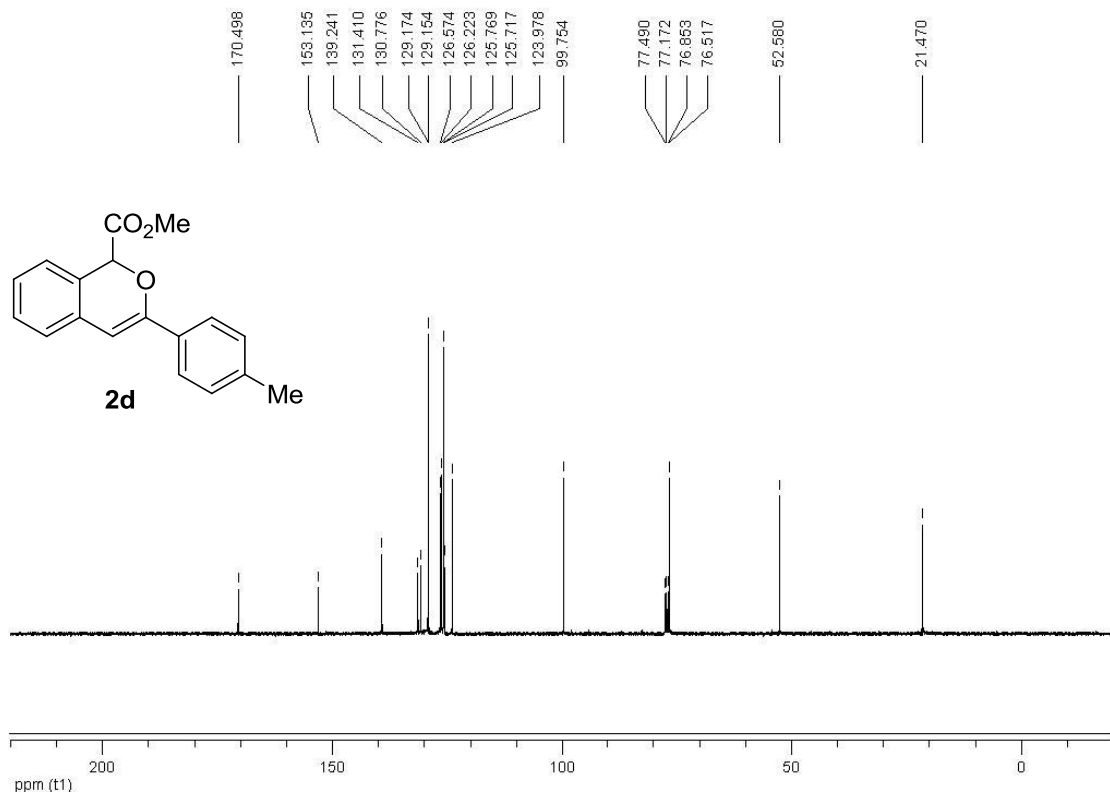



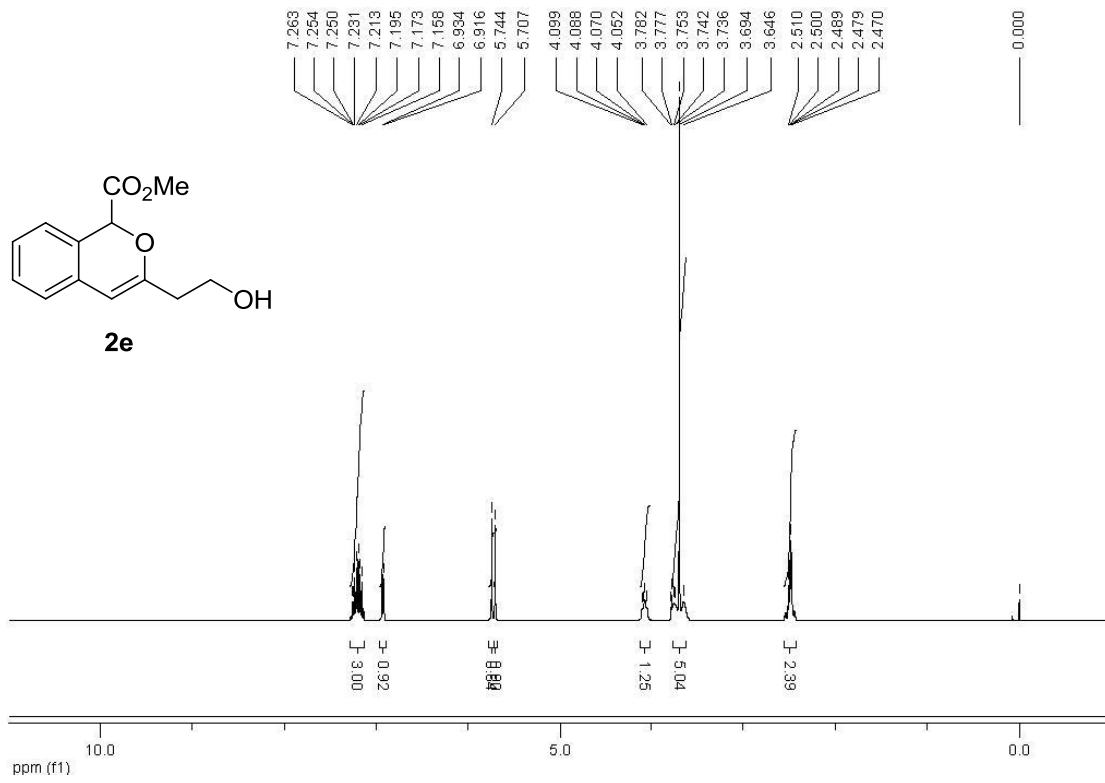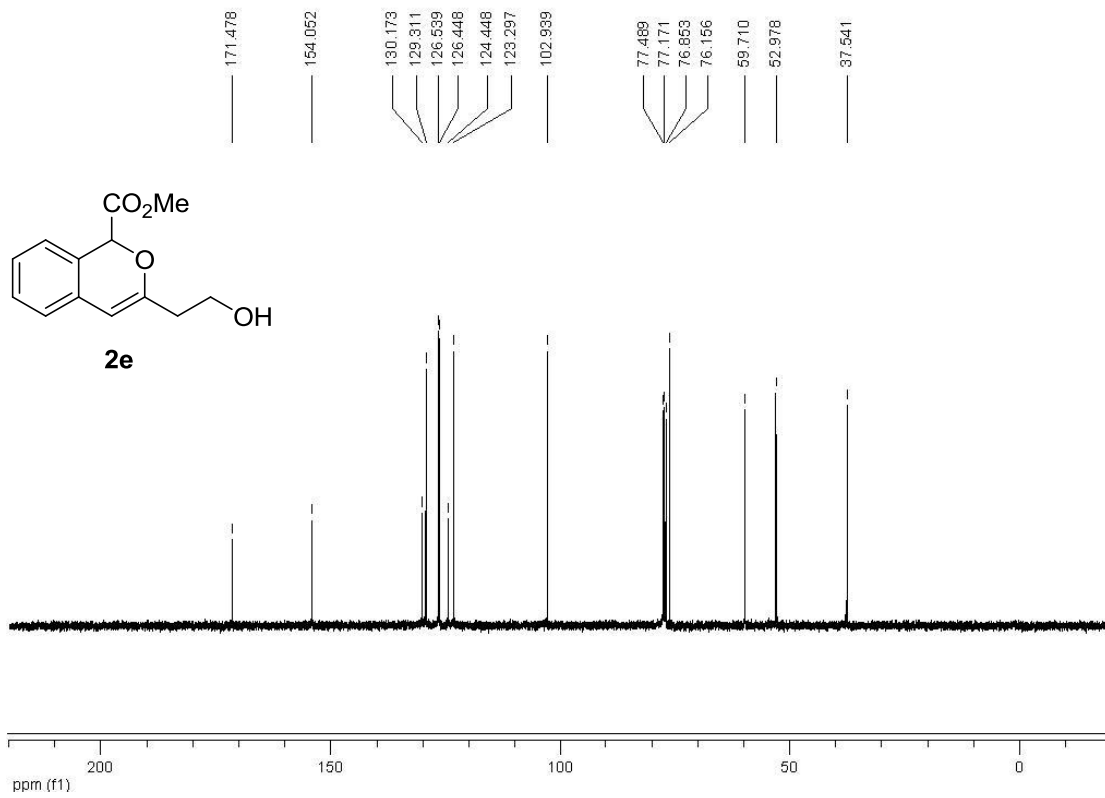

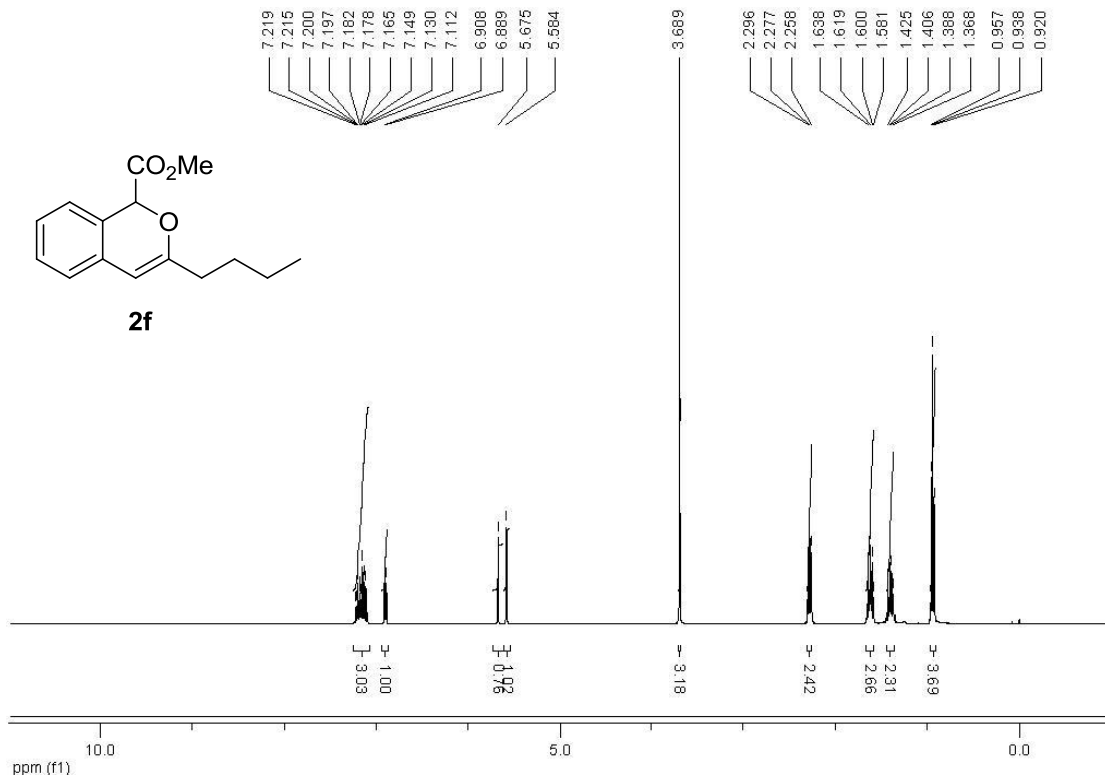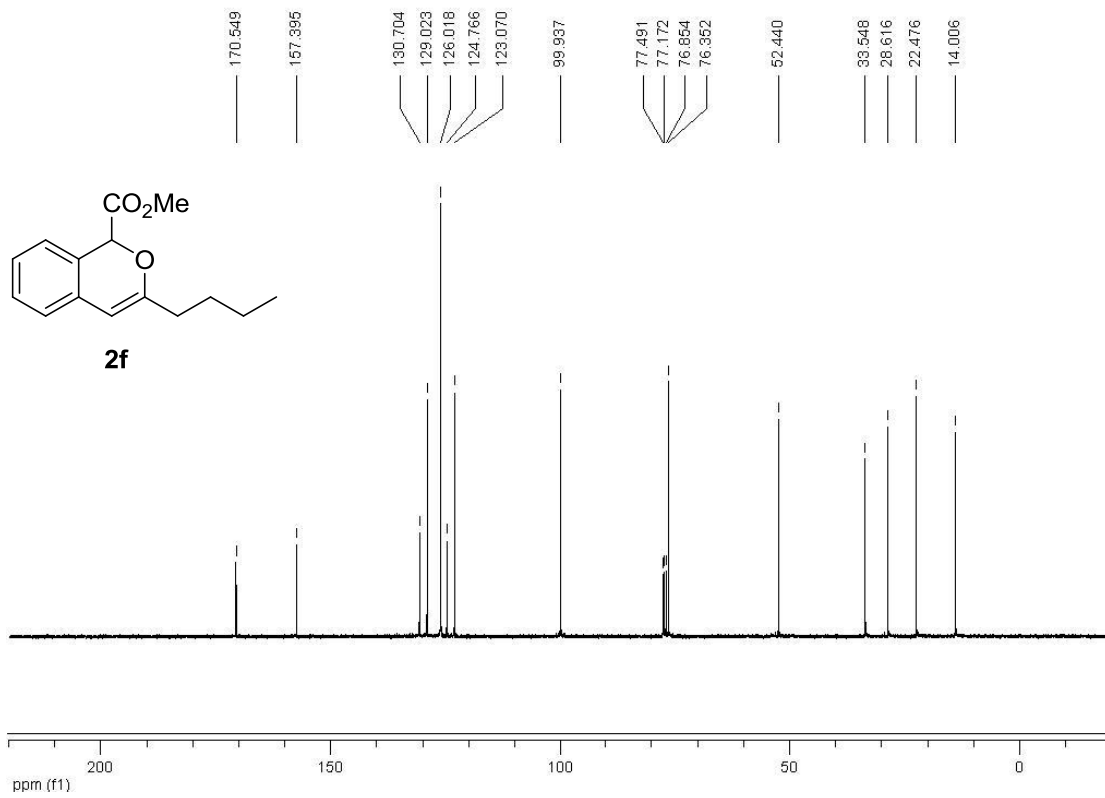

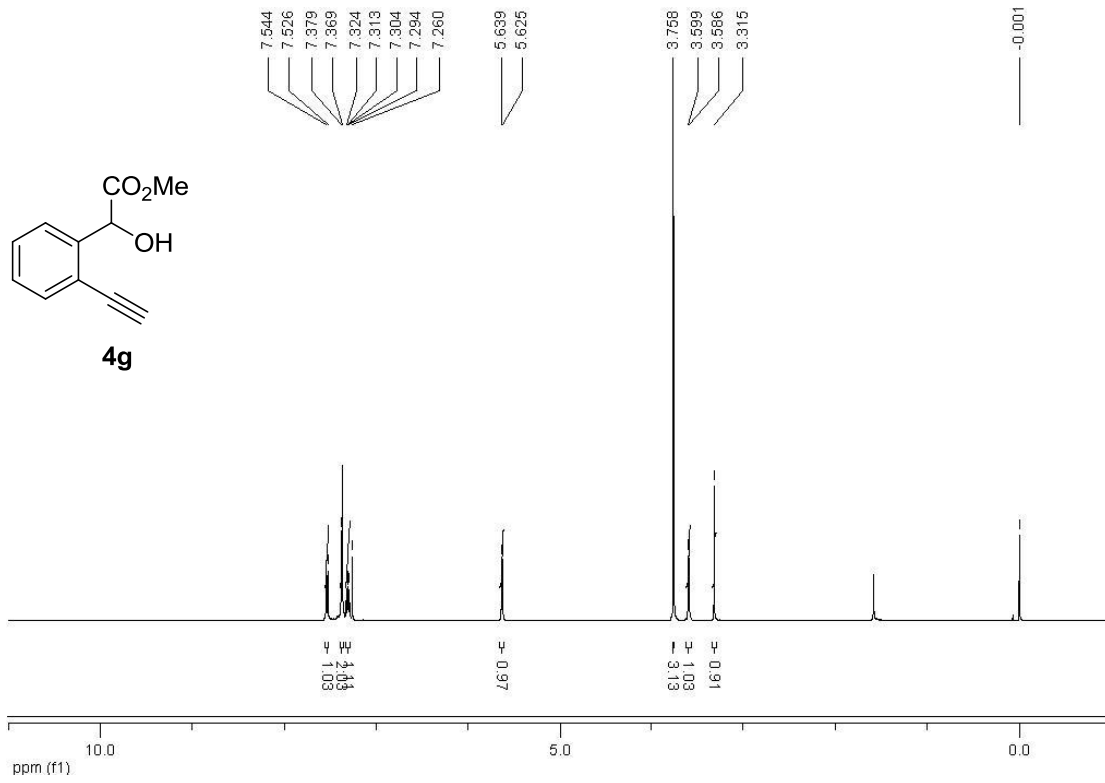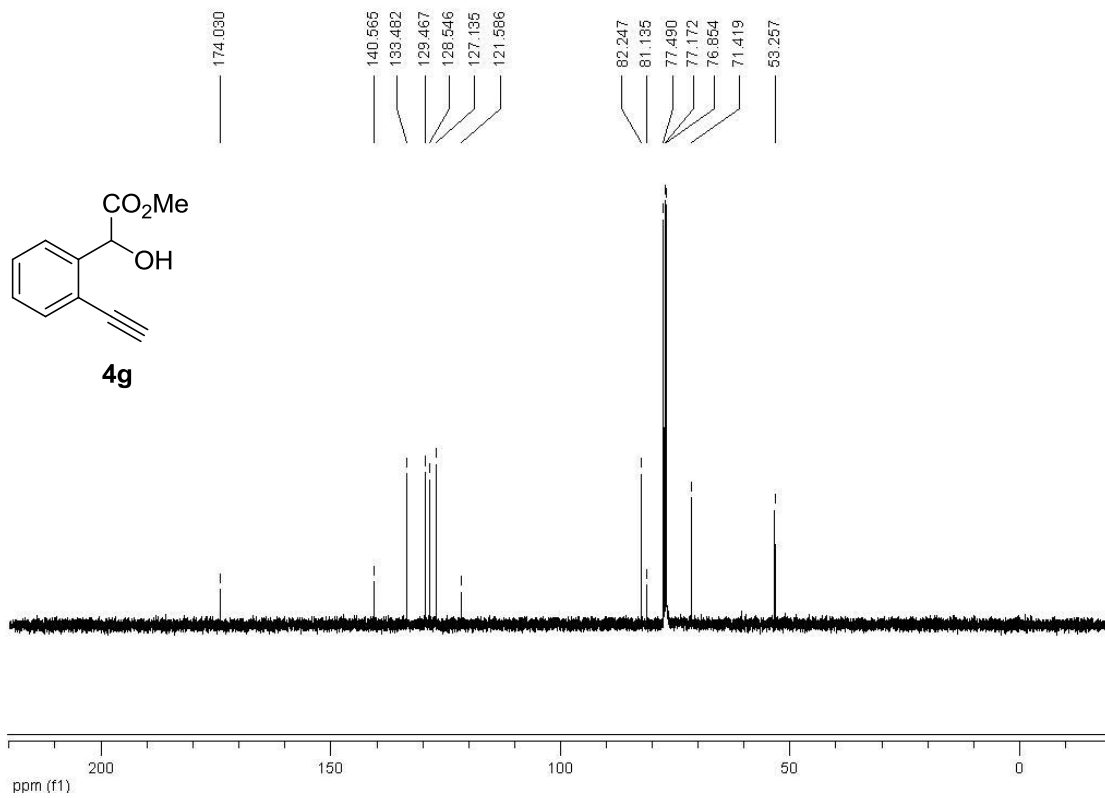

Supplement: Additional file 1 [file 1860-5397-7-74-S1.pdf]
